# Supplementary material
Source: PubMed Central journal article supplement (PMC4131203)

## SUPPLEMENTARY INFORMATION

### Synthesis and Biological Evaluation of Low Molecular Weight Fluorescent Imaging Agents for the Prostate-Specific Membrane Antigen

Ying Chen,<sup>1</sup> Mrudula Pullambhatla,<sup>1</sup> Sangeeta R. Banerjee,<sup>1</sup> Youngjoo Byun,<sup>2</sup> Marigo Stathis,<sup>3</sup> Camilo Rojas,<sup>3</sup> Barbara S. Slusher,<sup>3</sup> Ronnie C. Mease,<sup>1</sup> Martin G. Pomper<sup>1</sup>

#### HPLC Analysis of Final Compounds.

Column: phenomenex Luna C18 10 $\mu$ , 250  $\times$  4.6 mm.

Method I: mobile phase, A = 0.1% TFA in H<sub>2</sub>O, B = 0.1% TFA in CH<sub>3</sub>CN; gradient, 0 min = 15% B, 30 min = 35% B; flow rate, 2 mL/min.

Method II: mobile phase, A = 0.1% TFA in H<sub>2</sub>O, B = 0.1% TFA in CH<sub>3</sub>CN; gradient, 0 min = 25% B, 30 min = 45% B; flow rate, 2 mL/min.

Method III: mobile phase, A = 0.1% TFA in H<sub>2</sub>O, B = 0.1% TFA in CH<sub>3</sub>CN; gradient, 0 min = 40% B, 30 min = 60% B; flow rate, 2 mL/min.

Method IV: mobile phase, A = 0.1% TFA in H<sub>2</sub>O, B = 0.1% TFA in CH<sub>3</sub>CN; gradient, 0 min = 10% B, 30 min = 40% B; flow rate, 2 mL/min.

800CW-1 (method I)

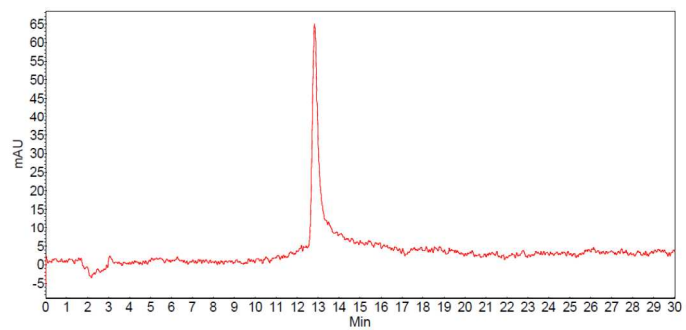

800CW-2 (method I)

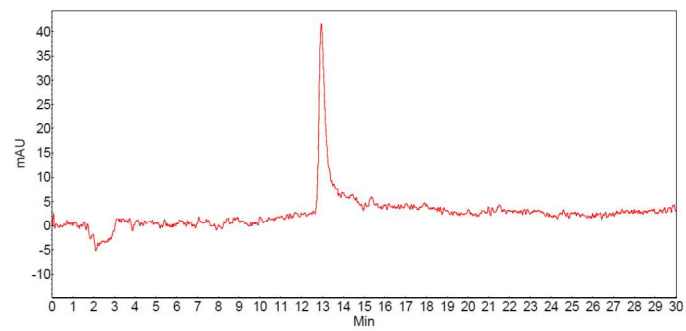

800CW-3 (method I)

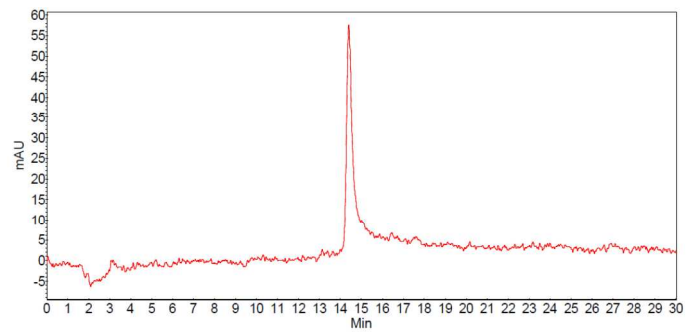

800RS-1 (method II)

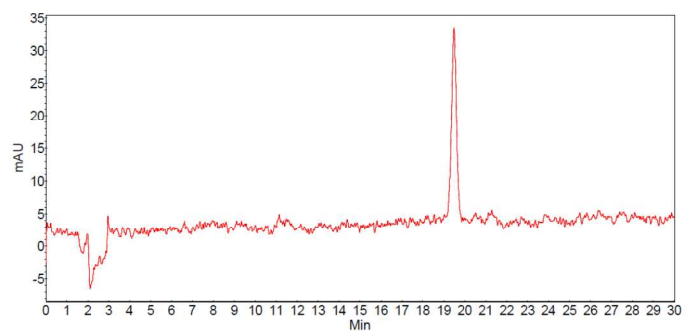

800RS-2 (method II)

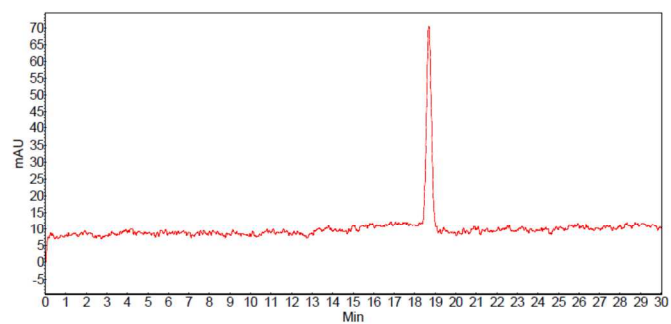

800RS-3 (method II)

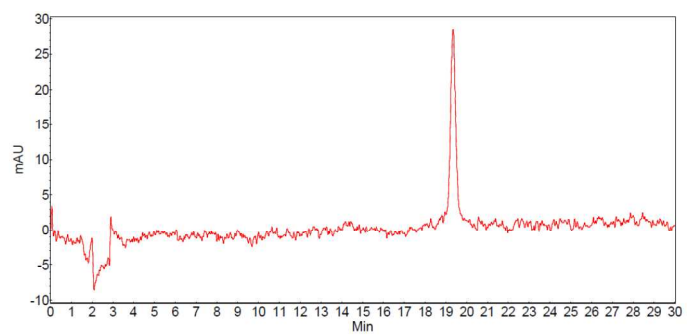

ICG-1 (method III)

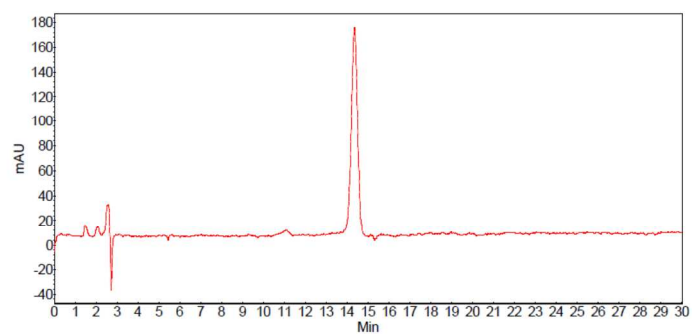

ICG-2 (method III)

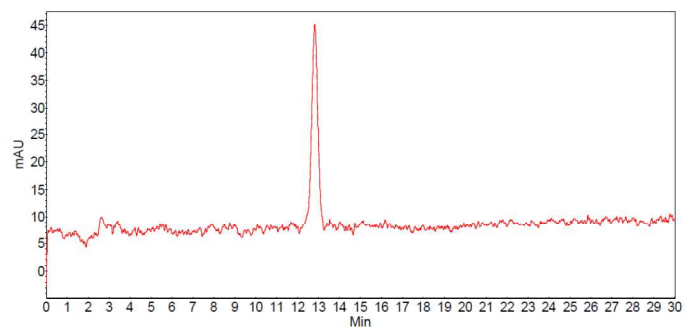

ICG-3 (method III)

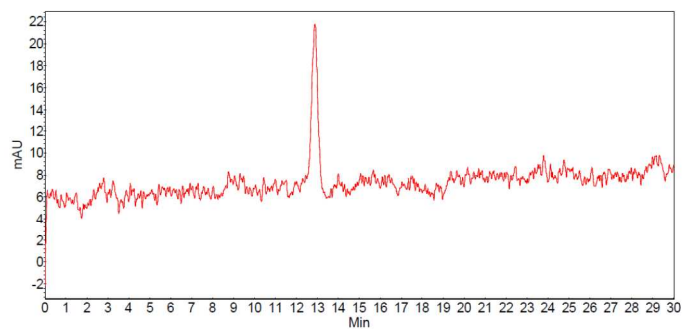

Cy7-1 (method I)

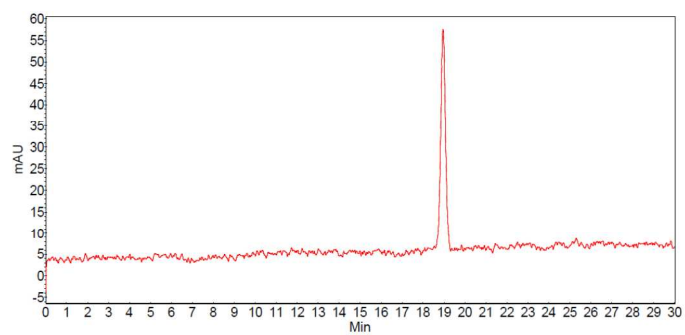

Cy7-2 (method I)

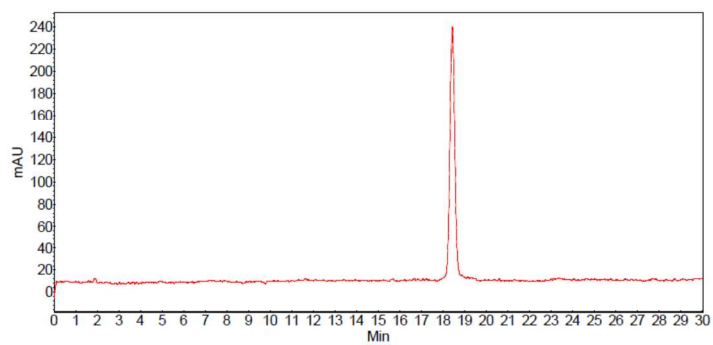

Cy7-3 (method I)

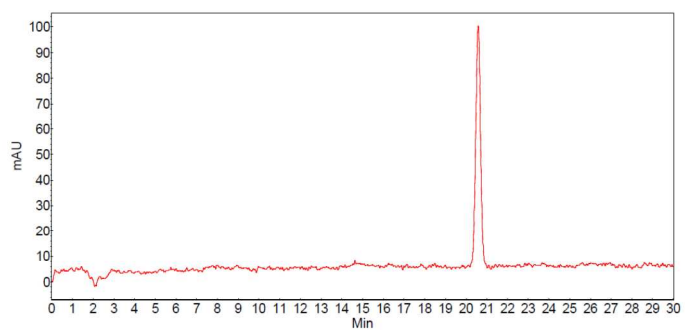

Cy5.5-1 (method IV)

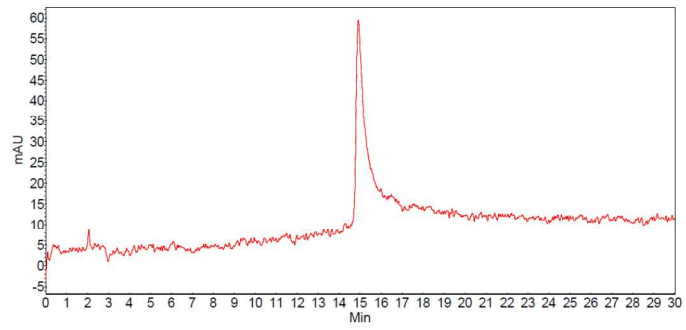

Cy5.5-2 (method IV)

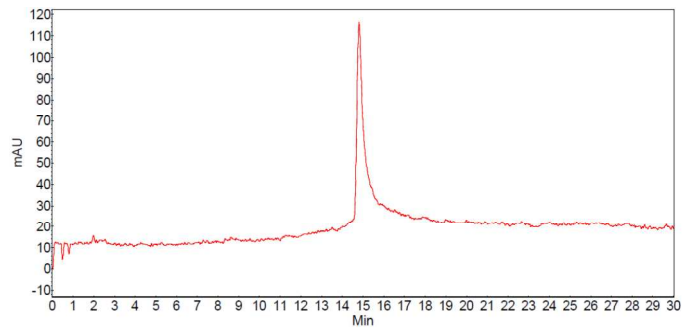

Cy5.5-3 (method IV)

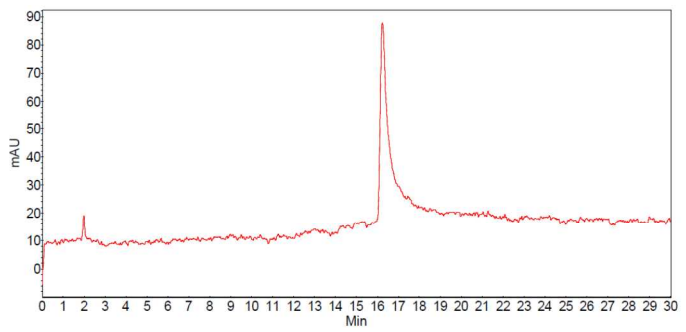

Supplement: NIHMS610645-supplement-01.pdf [file NIHMS610645-supplement-01.pdf]
